# Supplementary material
Source: Copernicus journal article supplement (doi:10.5194/cp-22-783-2026)
Supplement: Supplementary file 1 [file cp-22-783-2026-supplement.pdf]

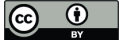

*Supplement of*

## **Information loss in palaeoecological data from process and observer error**

**Quinn Asena et al.**

*Correspondence to:* Quinn Asena ([qasena@wisc.edu](mailto:qasena@wisc.edu))

The copyright of individual parts of the supplement might differ from the article licence.

## Supplementary Information

### Model parameters

The four scenarios (Table S1) cover a range of 'fast' and 'slow' driver conditions. All scenarios have two drivers: a primary driver (different among scenarios) carrying 0.85 of the overall environmental driver effect and a random walk driver (with the same parameterisation across scenarios) downweighted to 0.15 of the total environmental effect (Table S2). In scenarios 1 and 2, the magnitude of change in the primary driver is insufficient to cause a complete species turnover and generalist species survive the shift in extrinsic conditions. The random walk driver may amplify, or dampen, the effects of the primary driver, but in general is favourable to most species and acts to stabilise the system. In scenarios 3 and 4 the primary linear driver eventually reaches values unfavourable to most species and the system experiences an average loss of species rather than compositional turnover. Continued change beyond this threshold would eventually cause all species to become extinct. For details on simulating drivers, and the underlying model, see Asena, Perry, and Wilmshurst (2024).

*Table S1: Four different scenarios were simulated representing different driving conditions. Scenario 1 is the example followed in the main text.*

| Scenarios                           | Drivers                                                                                                                                                             | Description                                                                                                                                                                                                                                                                                                                                                                                                                                                 |
|-------------------------------------|---------------------------------------------------------------------------------------------------------------------------------------------------------------------|-------------------------------------------------------------------------------------------------------------------------------------------------------------------------------------------------------------------------------------------------------------------------------------------------------------------------------------------------------------------------------------------------------------------------------------------------------------|
| Scenario 1: non-linear fast forcing | An abrupt extrinsic driver switching between two constant conditions and randomly changing driver. The random driver is weighted to 0.15 of the total effect.       | The primary influence on the system is from the abrupt extrinsic driver causing a shift in ecosystem assemblage. The primary driver alone is not sufficient to cause a complete species turnover, with generalist species surviving both driver conditions, although, the random walk driver can exaggerate or dampen the effects of the primary driver.                                                                                                    |
| Scenario 2: non-linear slow forcing | A driver following a logistic curve combined with a randomly changing driver. The random driver carries 0.15 of the total environmental effect.                     | The magnitude of change in the logistic driver is the same as scenario 1 and generalist species can survive under both conditions. However, the rate of change between conditions is slower, causing a more gradual shift in assemblage. The random driver introduces variability and coupled driver effects.                                                                                                                                               |
| Scenario 3: linear slow forcing     | A linearly increasing driver with a random driver weighted to 0.15 of the effect.                                                                                   | The slow linear driver is the primary influence on species assemblages. The extent of change in the linear driver causes a complete, or near-complete, species turnover by the end of the simulation with a low likelihood of generalist species surviving the entire simulation. Species turnover is expected to be gradual in the majority of model runs, although the random walk or combined driver effects can speed up (or slow down) species change. |
| Scenario 4: linear fast forcing     | A linearly increasing driver, with a faster rate of increase than scenario 3, coupled with a random driver. The random driver is weighted to 0.15 of driver effect. | The fast linear driver has a greater magnitude and rate of change than scenario 3, causing the system to move through assemblages faster. In general, the random walk is favourable to most species with a low likelihood of drifting towards extreme values (relative to the species parameters). However, drift in the random walk, coupled with the linear driver, can cause periods of rapid change or stability.                                       |

*Table S2: Input values to simulate driving conditions.*

| Scenario                            | Drivers     | Parameter values |                          |                                      |               |                     |
|-------------------------------------|-------------|------------------|--------------------------|--------------------------------------|---------------|---------------------|
| Scenario 1: non-linear fast forcing | Abrupt      | Start value = 98 | End value = 102          | Onset of change = 3000               | Weight = 0.85 |                     |
|                                     | Random walk | Mean = 100       | Standard deviation = 0.2 |                                      | Weight = 0.15 |                     |
| Scenario 2: non-linear slow forcing | Logistic    | Start value = 98 | End value = 102          | Onset of change = 1000               | Weight = 0.85 | Growth rate = 0.003 |
|                                     | Random walk | Mean = 100       | Standard deviation = 0.2 |                                      | Weight = 0.15 |                     |
| Scenario 3: linear slow forcing     | Linear      | Start value = 95 | End value = 110          | Rate of change per time-step = 0.003 | Weight = 0.85 |                     |
|                                     | Random walk | Mean = 100       | Standard deviation = 0.2 |                                      | Weight = 0.15 |                     |
| Scenario 4: linear fast forcing     | Linear      | Start value = 90 | End value = 115          | Rate of change per time-step = 0.005 | Weight = 0.85 |                     |
|                                     | Random walk | Mean = 100       | Standard deviation = 0.2 |                                      | Weight = 0.15 |                     |

Species parameters are the same across the four scenarios (Table S3). For details around simulating pseudoproxies see Asena, Perry, and Wilmshurst (2024).

*Table S3: Input values to simulate species.*

| Parameter                                 | Distribution        | Values              |                          | Description                                                                                                                                                                                                                                                                                    |
|-------------------------------------------|---------------------|---------------------|--------------------------|------------------------------------------------------------------------------------------------------------------------------------------------------------------------------------------------------------------------------------------------------------------------------------------------|
| Tolerance optima                          | Gaussian            | Mean = 100          | Standard deviation = 20  | The optima of a species to a driver. Each species has one tolerance per driver that, along with the breadth parameter, make up the species' niche.                                                                                                                                             |
| Tolerance breadth                         | Gaussian            | Mean = 20           | Standard deviation = 1   | The breadth of each species' tolerance to each driver is drawn from a Gaussian distribution and defines the how generalist a species is to a given driver.                                                                                                                                     |
| Carrying capacity                         | Gaussian            | Mean = 4000         | Standard deviation = 500 | Total possible abundance per species that varies through time. Carrying capacity is truncated at $5 \times$ SD.                                                                                                                                                                                |
| Carrying capacity variability             | Uniform             | Min = 0.8           | Max = 1                  | The proportion that the carrying capacity varies per time-step. Carrying capacity variability is not temporally correlated.                                                                                                                                                                    |
| Maximum population growth rate per driver | Uniform             | Min = 1.01          | Max = 1.10               | A maximum population growth rate is calculated per driver (i.e., the maximum possible growth rate at the peak of the tolerance); the more drivers, the higher the possible product of the growth rates. Growth rates are tuned according to the number of drivers and the taxa they represent. |
| Dispersal probability                     |                     | Probability = 0.01  |                          | The probability for each species per time-step of an addition to the species' abundance via dispersal from an outside population.                                                                                                                                                              |
| Dispersal size                            | Uniform             | Min = 1             | Max = 10                 | Number of individuals added to a species' abundance via dispersal from an outside population.                                                                                                                                                                                                  |
| Disturbance probability                   |                     | Probability = 0.002 |                          | Probability of a disturbance event occurring each time-step.                                                                                                                                                                                                                                   |
| Disturbance size                          | Gamma (exponential) | Shape = 1           | Rate = 8                 | Size of the disturbance is a proportional loss of abundance with a value drawn from a gamma distribution for each species (with larger disturbances becoming exponentially less likely).                                                                                                       |

Table S4: List of features extracted from principal curves and Fisher’s Information time series and their description. The scenario column indicates which of the four scenarios retained the feature after dropping highly correlated features. “F1” indicates that the feature was extracted from the Fisher’s Information time-series for scenario 1. “P1” indicates that the feature was extracted from the principal curve for scenario 1.

| Metric                                          | Description                                                                              | Scenario               |
|-------------------------------------------------|------------------------------------------------------------------------------------------|------------------------|
| Maximum                                         | Maximum value in series                                                                  |                        |
| Minimum                                         | Minimum value in series                                                                  | F4, F3, F2, F1         |
| Range                                           | Range of series                                                                          |                        |
| Mid-range                                       | Mid-range of series                                                                      |                        |
| Mean                                            | Mean of series                                                                           | F4, P3                 |
| Standard deviation                              | Standard deviation of series                                                             |                        |
| Standard deviation to mean ratio                | Ratio of the standard deviation to the mean                                              |                        |
| Variance                                        | Variance of the series                                                                   |                        |
| Skew                                            | Skewness of the series                                                                   | F4, F2, F1             |
| Kurtosis                                        | Kurtosis of the series                                                                   |                        |
| Maximum percentage difference from median       | Largest percentage difference between maximum magnitude and the median                   |                        |
| Minimum percent difference from median          | Largest percentage difference between minimum magnitude and the median                   |                        |
| Absolute percent difference from median         | Largest percentage difference between either the maximum or min magnitude and the median |                        |
| Maximum percentage difference from mean         | Largest percentage difference between maximum magnitude and the mean                     | F1                     |
| Minimum percent difference from mean            | Largest percentage difference between minimum magnitude and the mean                     | F4, F3, P4, P3, P2, P1 |
| Absolute percent difference from mean           | Largest percentage difference between either the max or min magnitude and the mean       | F1                     |
| Absolute rate of change                         | Greatest percent rate of change either positive or negative                              |                        |
| Maximum rate of change                          | Greatest percent rate of change                                                          | F4, F3, F2, F1, P4, P2 |
| Minimum rate of change                          | Smallest percent rate of change                                                          | F4, F3, F2, F1, P2, P1 |
| Longest run of increasing rate of change        | Longest period of increasing percent rate of change                                      | F4, F3, F2, F1, P1     |
| Longest run of decreasing rate of change        | Longest period of decreasing percent rate of change                                      | F4, F3, F2, F1, P2, P1 |
| Maximum slope                                   | Largest change between two consecutive points                                            |                        |
| Minimum slope                                   | Smallest change between two consecutive points                                           |                        |
| Maximum absolute slope                          | Largest change between two consecutive points either positive or negative                |                        |
| Longest run of increasing slope                 | Longest period of increasing slope between two consecutive points                        |                        |
| Longest run of decreasing slope                 | Longest period of decreasing slope between two consecutive points                        |                        |
| Longest run of increasing values                | Longest period of monotonic increase                                                     |                        |
| Longest run of decreasing values                | Longest period of monotonic decrease                                                     |                        |
| Maximum difference between two points in window | Greatest change between two points in moving windows of 10                               | F4, F3, F2, F1, P3, P2 |

|                                                           |                                                                                                           |                                 |
|-----------------------------------------------------------|-----------------------------------------------------------------------------------------------------------|---------------------------------|
| Minimum difference between two points in window           | Smallest change between two points in moving windows of 10                                                | F4, F3, F2, F1, P2, P1          |
| Number of change points in mean and variance              | Number of change points identified using the mean and variance and pruned exact linear time (PELT) method | F4, F3, F2, F1, P4, P3, P2, P1  |
| Maximum change point in mean                              | Largest segment mean using the PELT method                                                                |                                 |
| Minimum change point in mean                              | Lowest segment mean using the PELT method                                                                 | F4, F3, F2, F1, P3, P2, P1      |
| Range of change point in mean                             | Range of segment means                                                                                    | F2, P3, P1                      |
| Largest difference between two change points in mean      | Greatest change point in mean using the PELT method                                                       | F4, F3, F2, F1                  |
| Smallest difference between two change points in variance | Smallest change point in mean using the PELT method                                                       | F4, F3, F2, F1                  |
| Maximum change point in variance                          | Largest segment variance using the PELT method                                                            |                                 |
| Minimum change point in variance                          | Smallest segment variance using the PELT method                                                           | F4, F3, F2, F1, P2, P1          |
| Range of change point in variance                         | Range of segment variances                                                                                |                                 |
| Largest difference between two change points in variance  | Greatest change point in variance using the PELT method                                                   | F2, F1, P4                      |
| Smallest difference between two change points in variance | Smallest change point in variance using the PELT method                                                   | F4, F3, F2, F1, P4              |
| Total number of change points non-parametric              | Number of change points identified using non-parametric functions                                         | F4, P4, P2, P1                  |
| Longest period of median state                            | Maximum number of time windows with the same number of median states calculated by Fisher's information   | F4, F3, F2, F1                  |
| Number of median states in longest period                 | Median number of states in the longest period of the same median state                                    | F4, F3, F2, F1                  |
| Longest period of mean state                              | Maximum number of time windows with the same number of mean states calculated by Fisher's information     | F4, F3, F2, F1                  |
| Number of mean states in longest period                   | mean number of states in the longest period of the same mean state                                        | F4, F3, F2, F1                  |
| Range of cumulative sum                                   | Range of the cumulative sum divided by number of observations multiplied by the standard deviation        |                                 |
| Maximum of cumulative sum                                 | Maximum of the cumulative sum divided by number of observations multiplied by the standard deviation      | F2                              |
| Minimum of cumulative sum                                 | Maximum of the cumulative sum divided by number of observations multiplied by the standard deviation      | F4, F3, F1                      |
| Von Neumann variance index                                | The von Neumann variance index. Requires equally spaced measurements                                      | Dropped due to high correlation |
| Von Neumann variance index time invariant                 | The von Neumann variance index accounting irregular intervals                                             | P4, P3, P1                      |

|                                            |                                                                                          |                                                                                  |
|--------------------------------------------|------------------------------------------------------------------------------------------|----------------------------------------------------------------------------------|
| Autocorrelation length                     | Autocorrelation function where its value is smaller than $\exp(-1)$                      | F2, P2, P1                                                                       |
| Median buffer range percentage             | Fraction of photometric points within amplitude div 10 of the median magnitude           | P4, P3, P2, P1                                                                   |
| Beyond 1 standard deviation                | Percentage of points beyond one standard deviation from mean                             | F2, F1, P4, P3, P2, P1                                                           |
| Fraction increase                          | The fractions of increasing first differences                                            | P1                                                                               |
| Fraction decrease                          | The fractions of decreasing first differences                                            | Dropped due to high correlation                                                  |
| Fraction ratio                             | Ratio of the fractions of increasing and decreasing first differences                    | F4, F3, F2, F1, P4, P3, P2                                                       |
| Small kurtosis                             | Kurtosis for small sample sizes                                                          | Dropped due to high correlation                                                  |
| Flux percentile ratios                     | The ratio of the difference between quantiles: mid 20, mid 35, mid 50, mid 65 and mid 80 | F4 (80), F2 (80), P4 (20, 80), P3 (65, 80), P2 (20, 35, 65, 80), P1 (35, 65, 80) |
| Percent difference flux percentile         | Difference between the 95th and 5th percentile over the median                           | F3, P4, P3, P2, P1                                                               |
| Quartile difference                        | Difference between the first and third quartile                                          | F4, F3, F2, F1, P4, P3, P2, P1                                                   |
| Median absolute deviation                  | Median discrepancy of the data from the median data                                      | P1                                                                               |
| Total number of features used per scenario |                                                                                          | F1 = 25, F2 = 26, F3 = 22, F4 = 25, P1 = 21, P2 = 20, P3 = 14, P4 = 14           |

## Scenario 2-4 results

Results for scenario 1 are included in the main paper. Following, are visualisations of the results from scenarios 2, 3, and 4; or details on methods, please see the main paper.

### Scenario 2: Fisher Information

Results for the feature analysis of the Fisher Information (FI) across the 31 replicate synthetic cores. Showing the Euclidean distance from the error-free benchmark as uncertainties increase in severity.

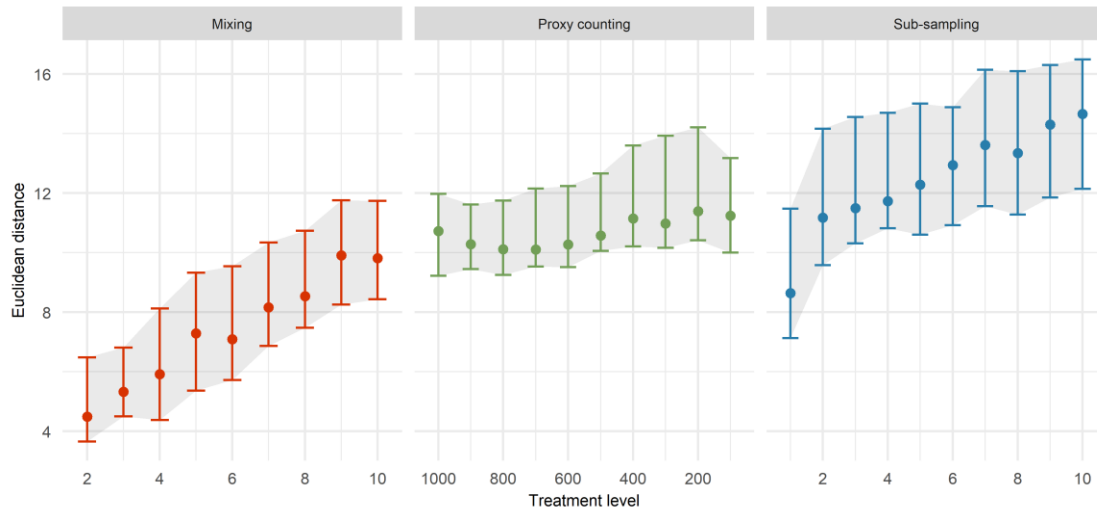

Figure S1: Change in median Euclidean distance on the features extracted from Fisher Information from the 'error-free' core when uncertainties are applied individually.

Results for two combined uncertainties for scenario 2:

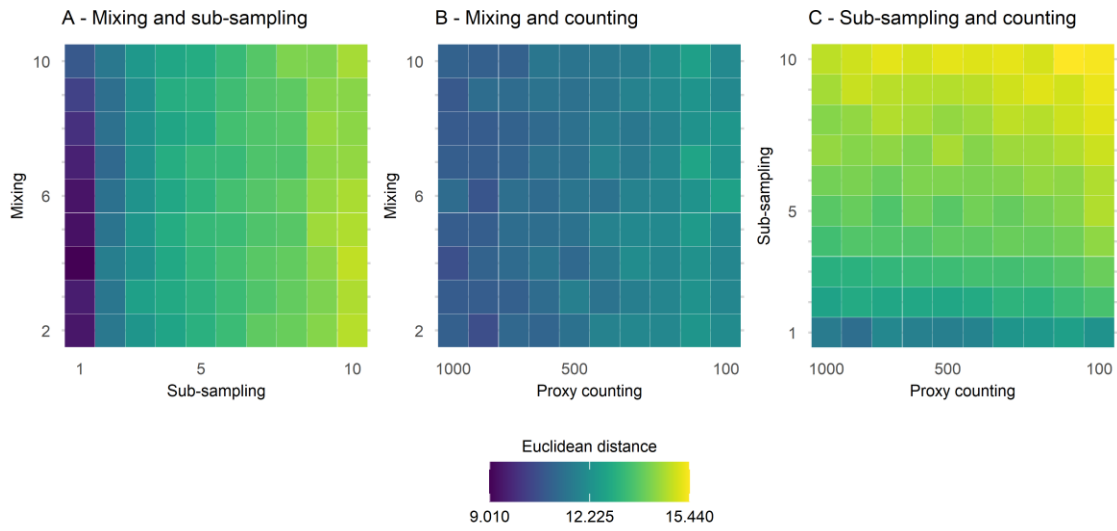

*Figure S2: Mean Euclidean distance from the 'error-free' reference core as uncertainty from the treatments increases simultaneously. Mixing in combination with sub-sampling (A) and proxy counting (B). Sub-sampling in combination with proxy counting shows a clear interaction effect as count resolution decreases and sub-sampling intervals increase (C).*

When three uncertainties are combined the change in mean Euclidean distance from the simulated counting process is shown across the facets.

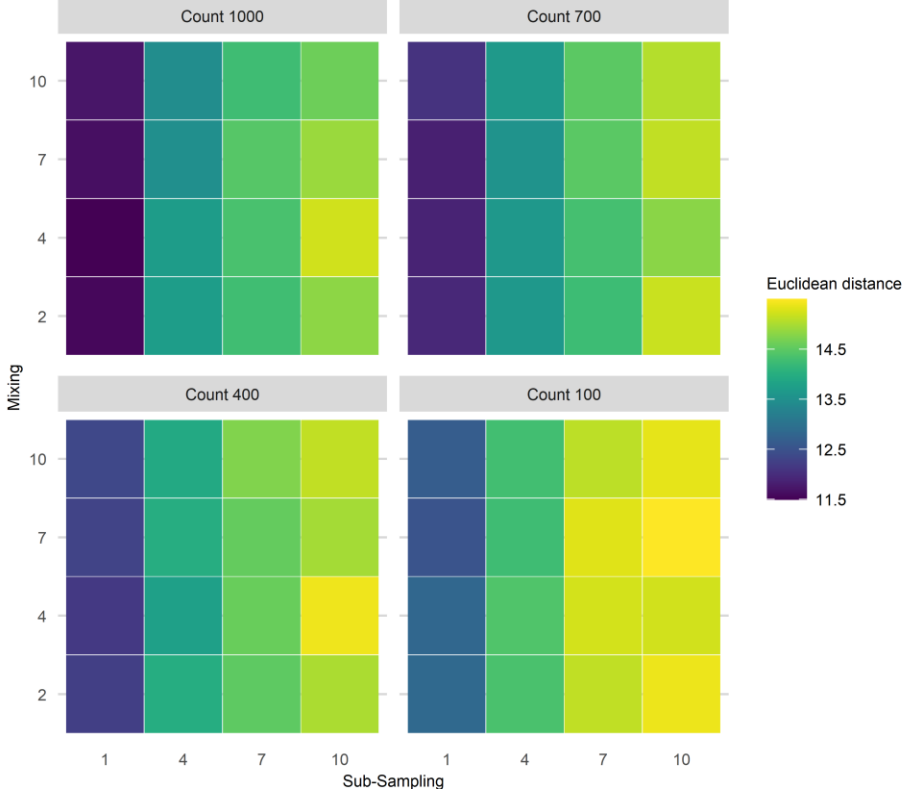

Figure S3: Change in mean Euclidean distance from the 'error-free' core with three treatments applied together. No consistent change in mean Euclidean distance is visible along the mixing axis, indicating no three-way interaction exists among treatments.

## Scenario 2: principal curves

The following figures show results from scenario 2 for the feature analysis of the principal curves (PrC) across the 31 replicate synthetic cores.

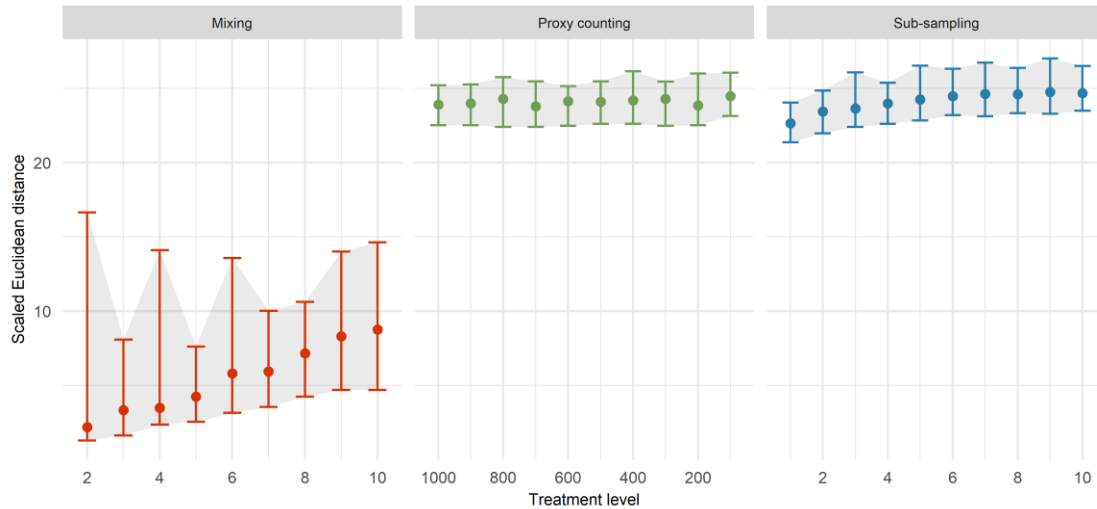

Figure S4: Effect of uncertainties on the median Euclidean distance of the features extracted from the PrCs from the 'error-free' reference.

Applying two uncertainties in combination:

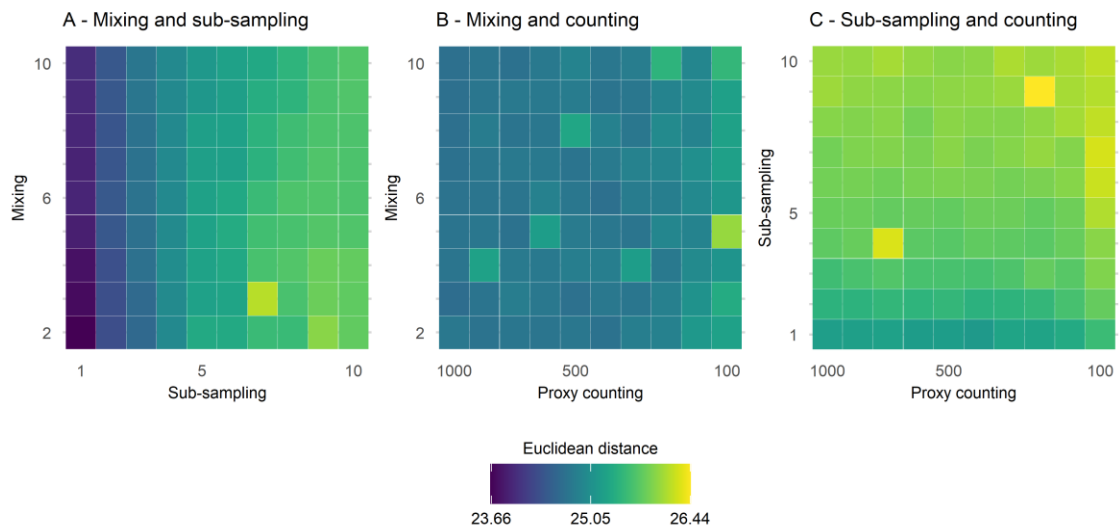

Figure S5: Mean Euclidean distance from the 'error-free' core as treatments are applied in combination to the PrC features.

Finally, the application of all three uncertainties:

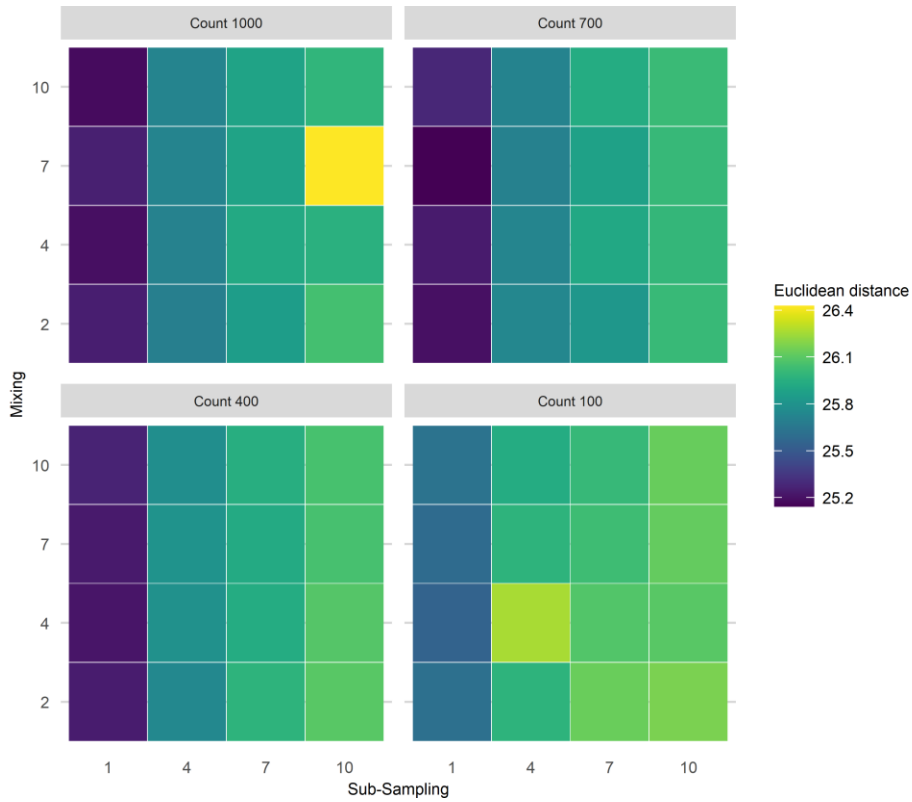

*Figure S6: Mean Euclidean distance from the 'error-free' core of all treatments increasing in combination. Proxy count resolution decreases across facets from top left to bottom right. Within each facet the axes show the sub-sampling (frequency in centimeters) and mixing treatments (number of time-steps).*

### Scenario 3: Fisher Information

Results from scenario 3 (Table S2), showing the change in Euclidean distance from the 'error-free' core as uncertainties are introduced.

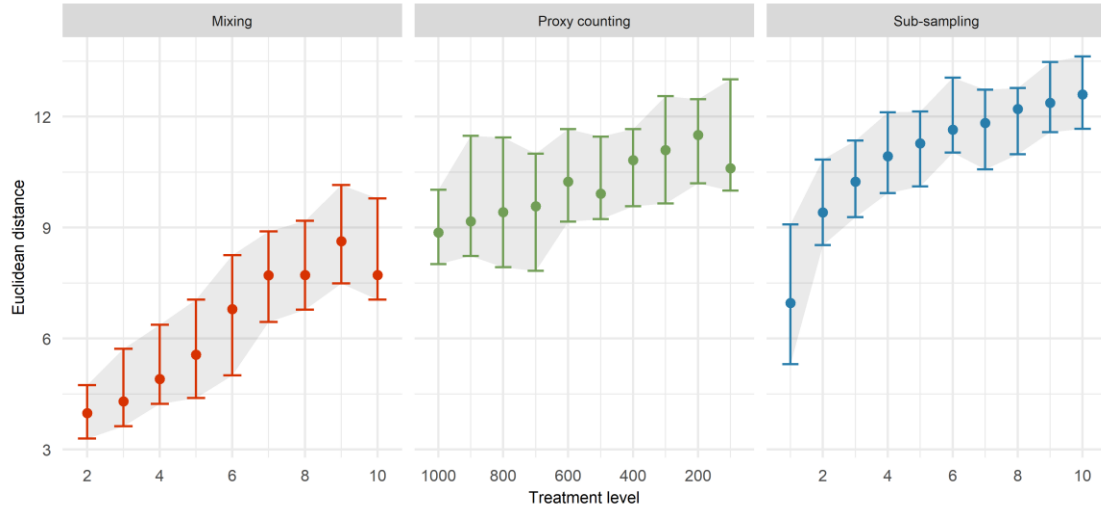

Figure S7: Change in median Euclidean distance from the 'error-free' benchmark in the features extracted from Fisher Information for each individual uncertainty applied at increasing levels.

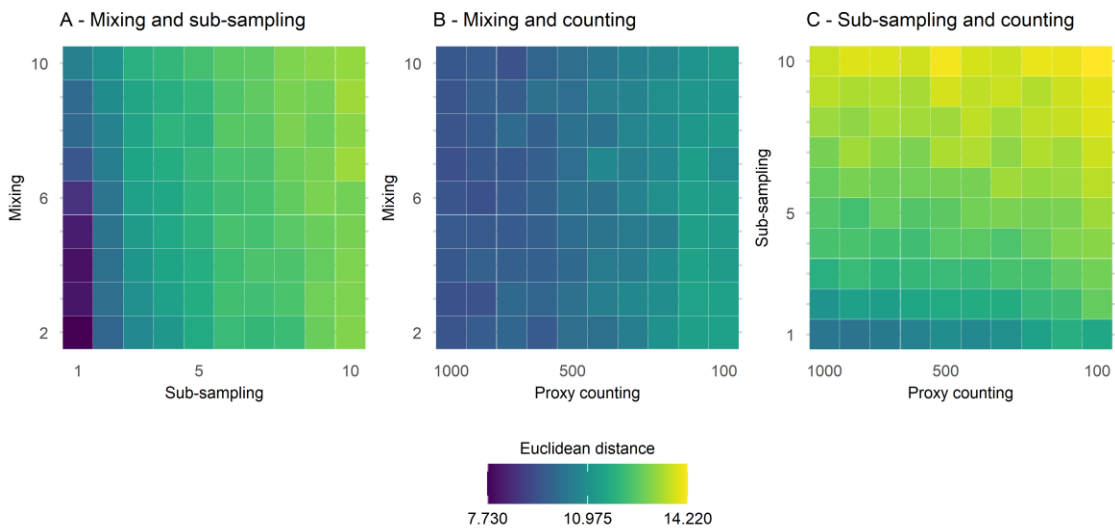

Figure S8: The increase in mean Euclidean distance from the 'error-free' core is shown for each combination of treatments. The weakest effect is observed from mixing in combination with proxy counting (A) when compared with mixing and sub-sampling (A) or sub-sampling in combination with proxy counting (C) which shows the strongest effect.

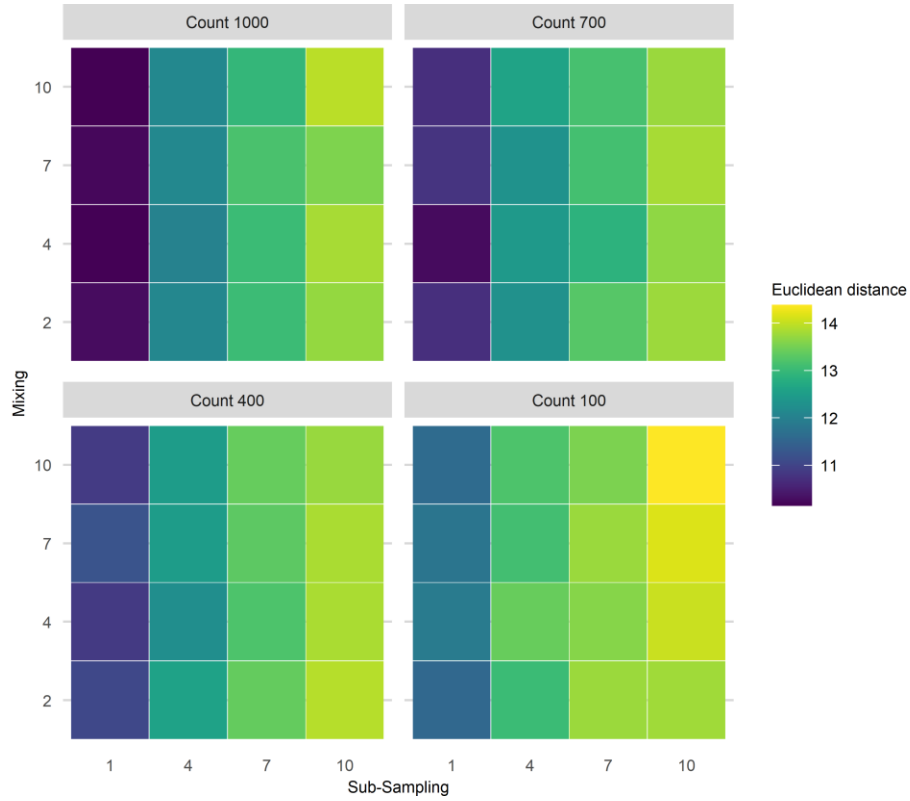

Figure S9: Change in mean Euclidean distance from the 'error-free' core is shown with proxy count resolutions decreasing across plot facets. Each facet shows the effects of mixing and sub-sampling along each axis.

Scenario 3: principal curves

Influence of uncertainties on the extracted features from the principal curves under scenario 3.

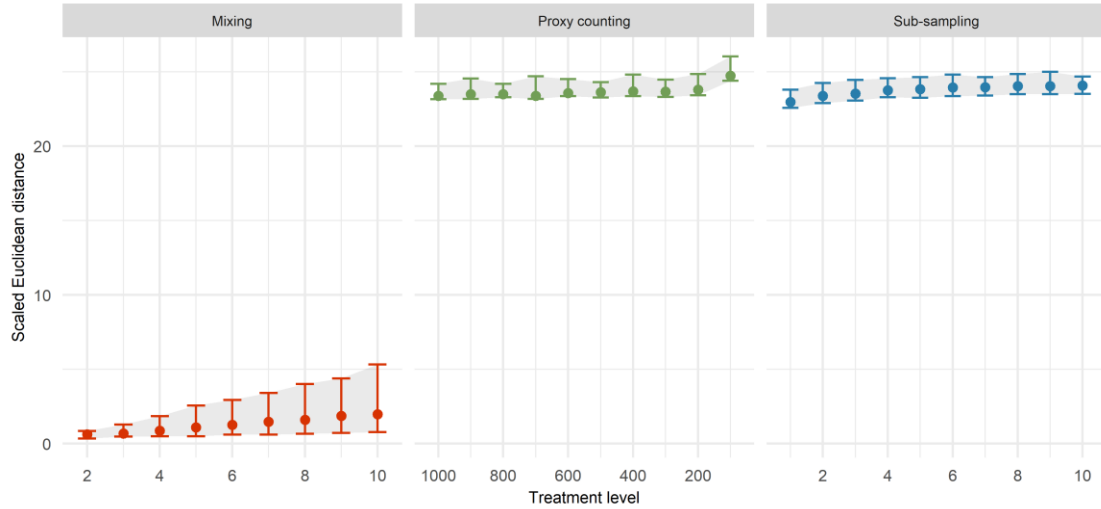

Figure S10: The effect on the extracted features from the principal curves when introducing individual uncertainties to the 'error-free' core. Showing the median, 25<sup>th</sup> and 75<sup>th</sup> quantiles.

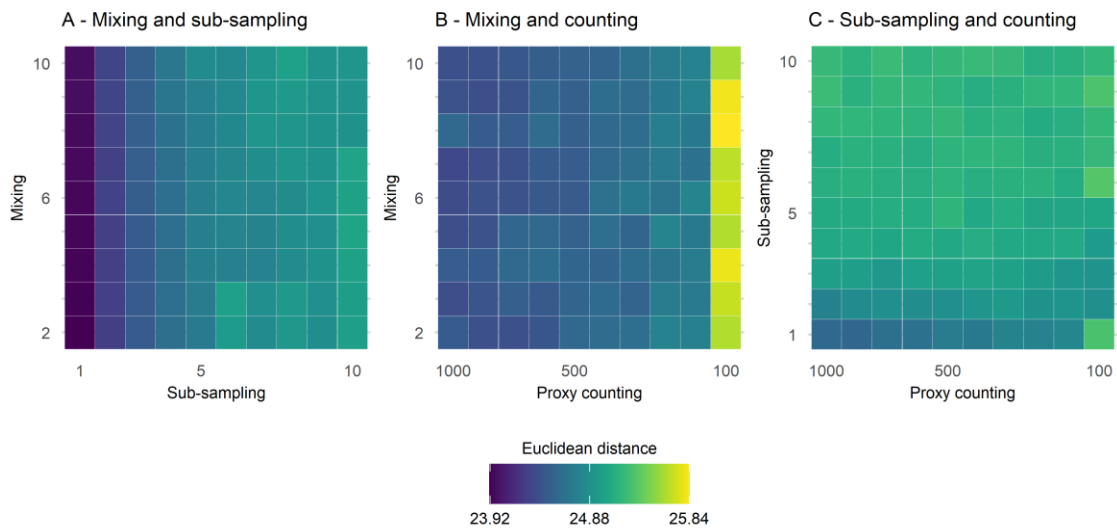

Figure S11: Mean Euclidean distance from the 'error-free' core of PrC features calculated across replicate simulations.

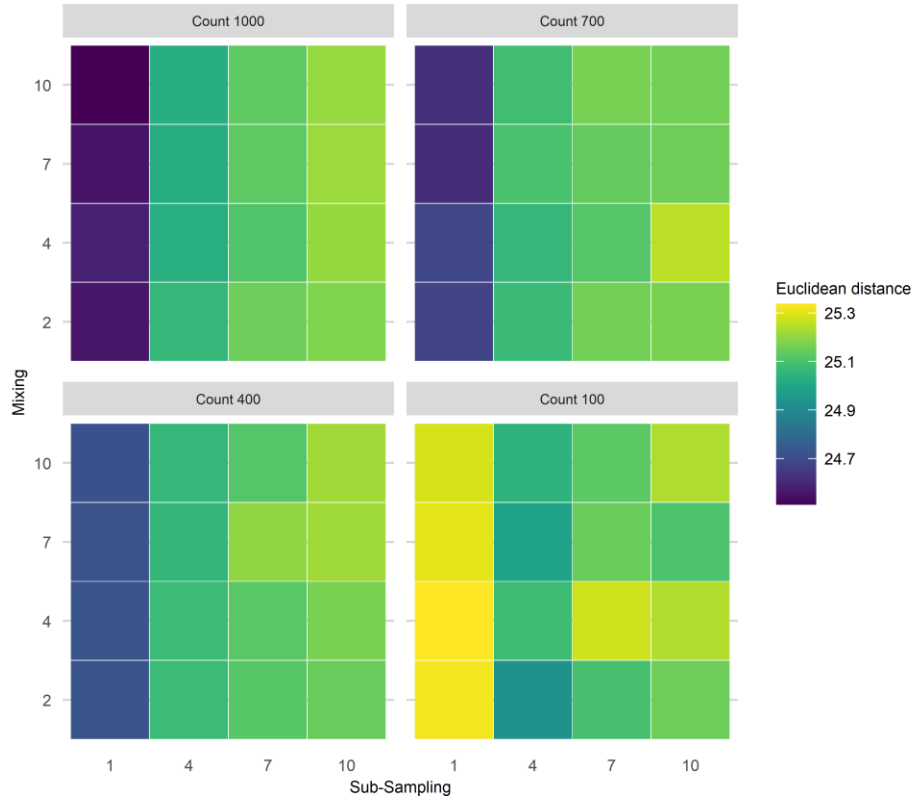

*Figure S12: Mean Euclidean distance from the 'error-free' core calculated across replicates from the distances along the PrCs.*

Scenario 4: Fisher Information

Results of the extracted features from the Fisher Information series across replicates for scenario 4 (Table S2) as uncertainties are introduced individually, and in combination.

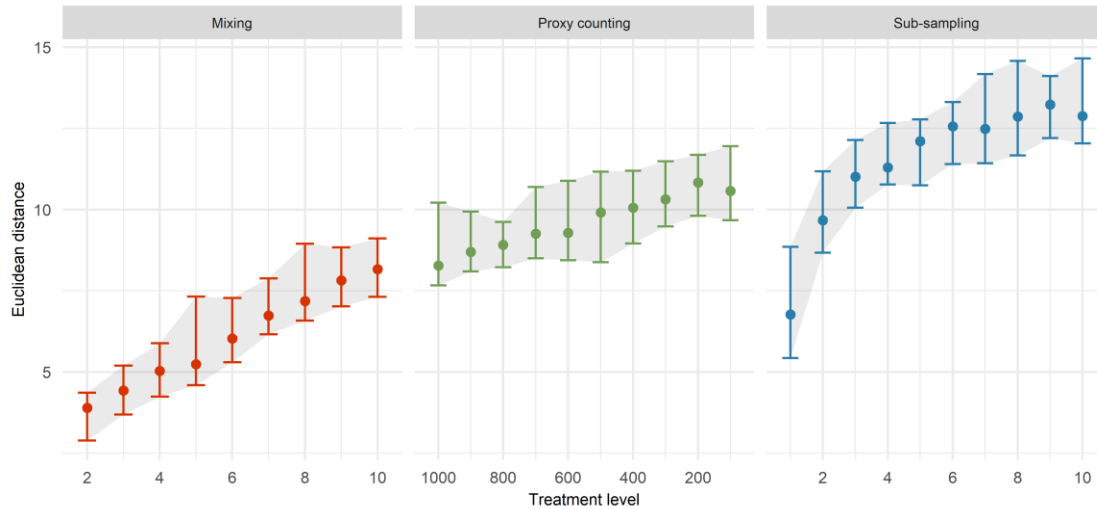

Figure S13: Influence of individual sources of uncertainty on the features extracted from Fisher's information for scenario 4. Showing the median, 25<sup>th</sup> and 75<sup>th</sup> quantiles.

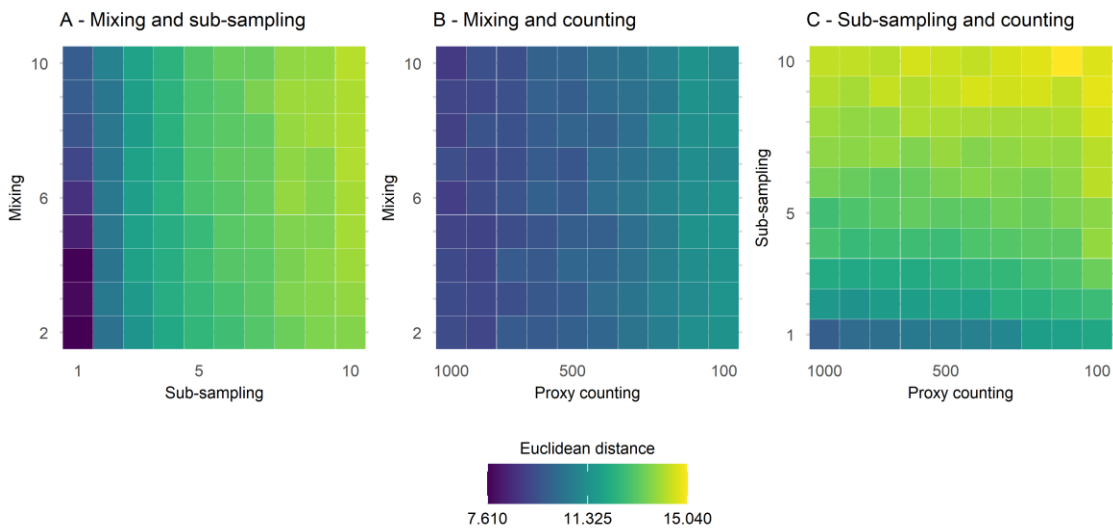

Figure S14: combination. Plots share a single scale to highlight differences among treatment combinations. Sub-sampling in combination with proxy counting (C) shows the greatest total increase in distance, followed by mixing in combination with sub-sampling (A), and finally mixing in combination with proxy counting (B). An interaction effect is clear as sub-sampling and counting treatments increase in severity together (increasing sub-sampling intervals and decreasing proxy count resolution) (C).

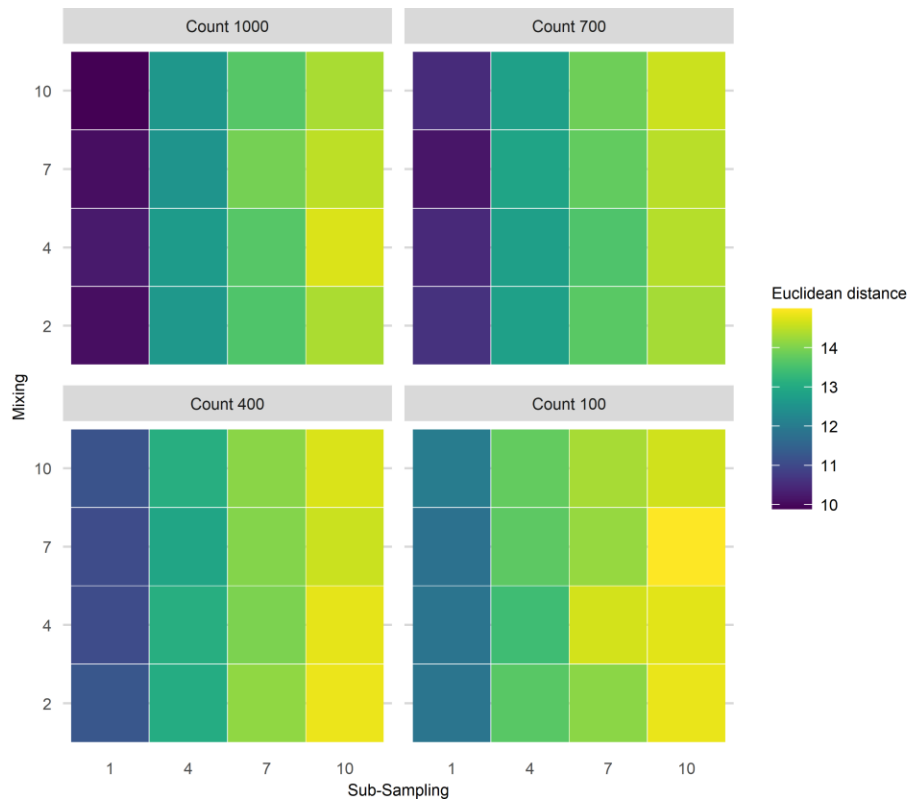

Figure S15: Change in mean Euclidean distance from the 'error-free' core for all three treatments applied simultaneously.

#### Scenario 4: principal curves

Median Euclidean distance of the extracted features from the principal curves under increasing levels of uncertainty.

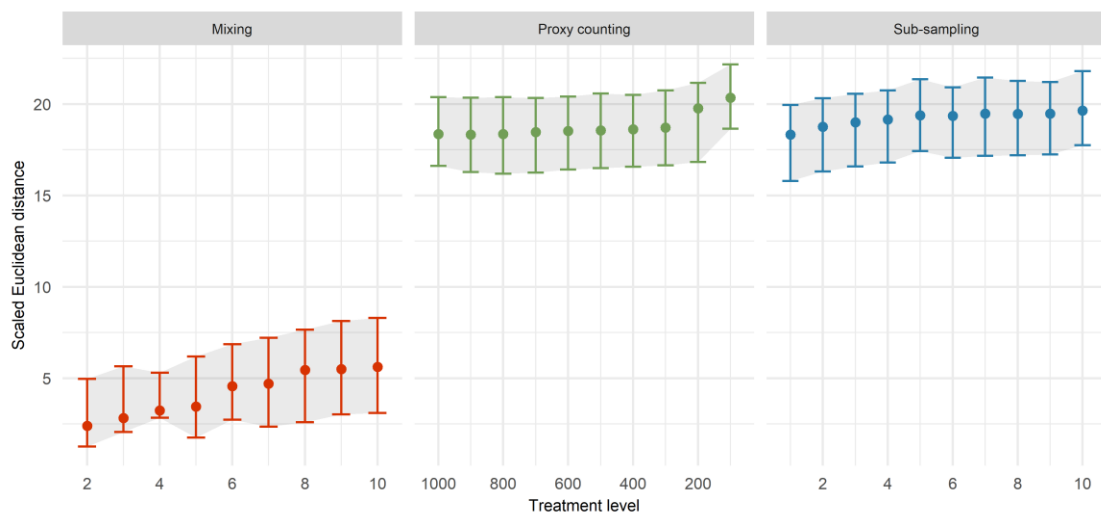

Figure S16: Effect on the mean Euclidean distance on the extracted features from the principal curves as uncertainties are applied individually.

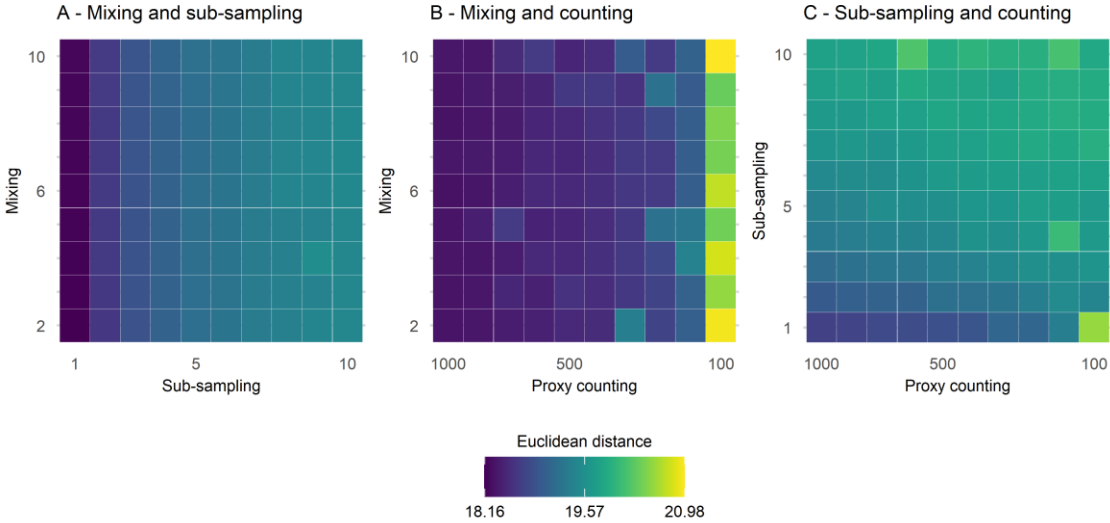

Figure S17: Mean Euclidean distance from the 'error-free' core of the extracted features from the PrCs calculated across replicate simulations.

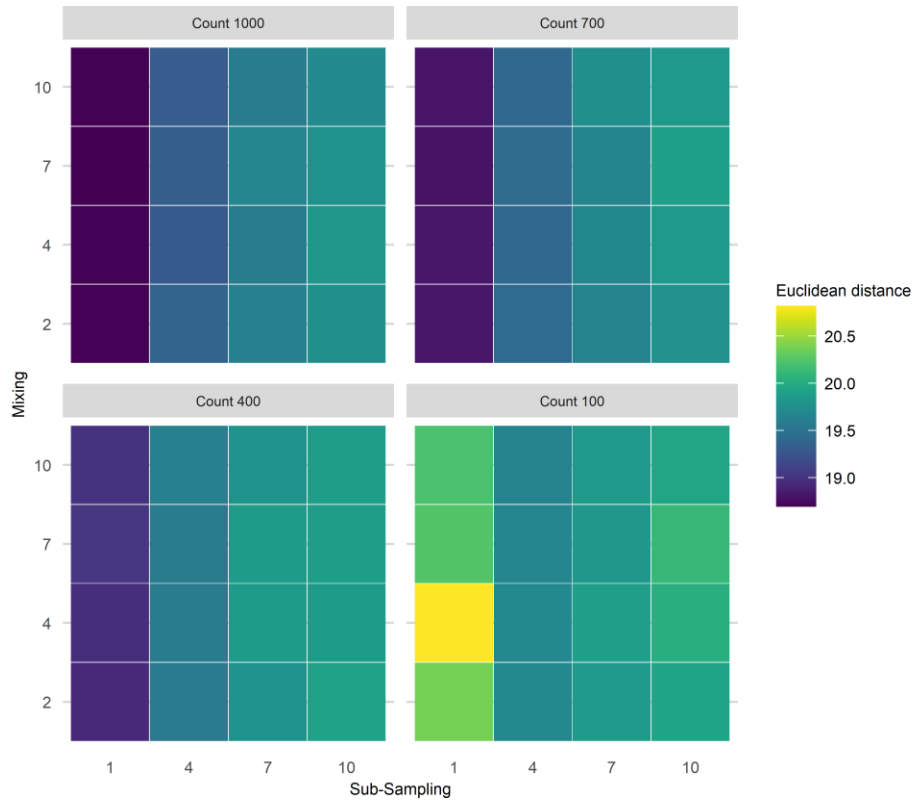

*Figure S18: Combined effects of all three treatments increasing in combination shown as the mean Euclidean distance from the 'error-free' core of the extracted features from the distances along the PrCs.*

## References

Asena, Quinn, George LW Perry, and Janet M Wilmshurst. 2024. "Is the Past Recoverable from the Data? Pseudoproxy Modelling of Uncertainties in Palaeoecological Data." *The Holocene*, May, 09596836241247304. <https://doi.org/10.1177/09596836241247304>.
